# Supplementary material for: LIGHT controls distinct homeostatic and inflammatory gene expression profiles in esophageal fibroblasts via differential HVEM and LTβR-mediated mechanisms
Source: PubMed Central journal article supplement (PMC8866113; doi:10.1038/s41385-021-00472-w), 2021-12-13
Supplement: 41385_2021_472_MOESM1_ESM.pdf [file 41385_2021_472_MOESM1_ESM.pdf]

## Supplementary materials

### Reagents

| Reagent                                       | brand       | code           | Application       |
|-----------------------------------------------|-------------|----------------|-------------------|
| Recombinant human TNFSF14/LIGHT               | R&D systems | #664-LI-025/CF | Cell stimulation  |
| NIK-SMI1                                      | ProbeChem   | PC-62514       | Cell treatment    |
| BAY11-7082                                    | Cayman chem | 10010266       | Cell treatment    |
| HiPerfect                                     | Qiagen      | 301705         | Cell transfection |
| Smooth muscle cell medium (SMCM)              | ScienCell   | 1101-b         | Cell culture      |
| Smooth muscle cell growth supplements (SMCGS) | ScienCell   | 1152           | Cell culture      |
| Dulbecco's modified essential medium          | Gibco       | 11995-065      | Cell culture      |
| Opti-MEM® I                                   | Gibco       | 31985-070      | Transfection      |
| Penicillin/Streptomycin                       | ScienCell   | 0503           | Cell culture      |
| Foetal Bovine Serum                           | ScienCell   | 0010           | Cell culture      |

### Short interfering RNAs and plasmids

| Reagent        | Brand     | Code             | Dose used |
|----------------|-----------|------------------|-----------|
| siNTC          | Dharmacon | D-001810-10-05   | 40nM      |
| siHVEM-B       | Origene   | SR305773B        | 40nM      |
| siLTβR         | Dharmacon | L-008023-00-0005 | 25nM      |
| pCMV6-XL4-HVEM | Origene   | SC117733         | 20ng/ml   |
| pCMV6-XL4      | Origene   | pCMV6-XL4        | 20ng/ml   |

## Patient details

| Patient | Gender  | Age | Eosinophil count d/m/p | Use                   |
|---------|---------|-----|------------------------|-----------------------|
| 1       | M       | 13  | 40/70/>100             | Fibroblasts           |
| 2       | M       | 10  | 8/0/0                  | Fibroblasts           |
| 3       | M       | 15  | >100/75/6              | Fibroblasts           |
| 4       | M       | 12  | 0/0/0                  | Fibroblasts           |
| 5       | M       | 5   | 3/0/0                  | Fibroblasts           |
| 6       | F       | 2   | 0/0/0                  | Fibroblasts           |
| 7       | F       | 19  | 100/30/45              | Fibroblasts           |
| 8       | M       | 16  | 100/100/72             | Fibroblasts           |
| 9       | Unknown | 9   | 1/2/1                  | Fibroblasts           |
| 10      | F       | 11  | 3/0/0                  | Fibroblasts           |
| 11      | M       | 12  | 10/100/100             | Fibroblasts           |
| 12      | M       | 18  | 30/55/20               | Fibroblasts/histology |
| 13      | M       | 8   | 27/2/0                 | Histology             |
| 14      | F       | 9   | 30/0/0                 | Histology             |
| 15      | M       | 7   | 85/10/85               | Histology             |
| 16      | M       | 10  | >100/>100/>100         | Histology             |
| 17      | M       | 4   | 22/23/44               | Histology             |
| 18      | M       | 11  | 44/53/60               | Histology             |
| 19      | M       | 10  | 60/1/0                 | Histology             |

## Primers

| Gene   | Primer | 5'-3'                 |
|--------|--------|-----------------------|
| RPL13A | FWD    | CATAGGAAGCTGGGAGCAAG  |
|        | REV    | GCCCTCCAATCAGTCTTCTG  |
| ICAM1  | FWD    | TTGTTGGGCATAGAGACCCC  |
|        | REV    | GGTTTTAGCTGTTGACTGCCC |
| IL32   | FWD    | AGAGCTGGAGGACGACTTCA  |
|        | REV    | CTCGGCACCGTAATCCATCT  |

|                              |     |                        |
|------------------------------|-----|------------------------|
| <b>IL33</b>                  | FWD | CATCTGGTACTCGCTGCCTGTC |
|                              | REV | CAACACCGTCACCTGATTCATT |
| <b>IL34</b>                  | FWD | CTTGGGATCTTCCTTGGCGT   |
|                              | REV | CAGCTTGTCCCGCAGAAAAC   |
| <b>CXCL5</b>                 | FWD | CACGCAAGGAGTTCATCCCA   |
|                              | REV | TCCTTCCCGTTCTTCAGGGA   |
| <b>BIRC3</b>                 | FWD | TCATCCGTCAAGTTCAAGCCA  |
|                              | REV | TCTCCTGGGCTGTCTGATGT   |
| <b>DKK1</b>                  | FWD | TGACAACTACCAGCCGTACC   |
|                              | REV | CGAGACAGATTTGCACGCCT   |
| <b>WNT2b</b>                 | FWD | GATCCGAGAGTGTCAGCACC   |
|                              | REV | CTGCCTCTCGGCTACTTCTG   |
| <b>WNT5a</b>                 | FWD | TTTGGCAGGGTGATGCAGAT   |
|                              | REV | GCCATAGTCGATGTTGTTCGC  |
| <b>BMP6</b>                  | FWD | TCATTGCACCCAAGGGCTAT   |
|                              | REV | GCACGGTTTGGGGACATACT   |
| <b>SEMA3B</b>                | FWD | CCTCCCTCAACCTGGACAAC   |
|                              | REV | GCAAATGGGTGCGGTTGTAG   |
| <b>HVEM</b>                  | FWD | GACCCTGGAGGAATGTCAGC   |
|                              | REV | CGAGGCTCCCTGAGAGAAAC   |
| <b>LT<math>\beta</math>R</b> | FWD | CCGACACAACCTGCAAAAAT   |
|                              | REV | GAGCAGAAAGAAGGCCAGTG   |

## Antibodies

| <b>Reagent</b>                              | <b>brand</b>              | <b>code</b>                | <b>Application</b>                  |
|---------------------------------------------|---------------------------|----------------------------|-------------------------------------|
| <b>Anti-ICAM1-PE</b>                        | eBioscience               | #12-0549-42                | Flow cytometry                      |
| <b>Anti-VCAM1-APC</b>                       | Biolegend                 | 305810                     | Flow cytometry                      |
| <b>Anti-CD74-PerCP</b>                      | Biolegend                 | 357607                     | Flow cytometry                      |
| <b>Anti-HVEM-APC</b>                        | Biolegend                 | 318808                     | Flow cytometry                      |
| <b>Polyclonal goat anti-LTβR</b>            | R&D systems               | AF629                      | Flow cytometry                      |
| <b>Anti-p65</b>                             | Cell signaling technology | 8242S                      | Western blot and immunofluorescence |
| <b>Anti-p100/p52</b>                        | Cell signaling technology | 3017T                      | Western blot                        |
| <b>Anti-GAPDH</b>                           | Cell signaling technology | 5174S                      | Western blot                        |
| <b>Anti-Lamin</b>                           | Thermo                    | MA3-1000                   | Western blot                        |
| <b>Anti-β-Tubulin</b>                       | Cell signaling technology | 2128S                      | Western blot                        |
| <b>Anti-Vimentin</b>                        | Sigma                     | V6389                      | immunofluorescence                  |
| <b>Anti-WNT2b</b>                           | Abcam                     | Ab178418                   | immunofluorescence                  |
| <b>Donkey anti-goat IgG Alexa Fluor 488</b> | Life technologies         | #A11055                    | Flow cytometry                      |
| <b>Alexa fluor 488</b>                      | Goat anti-rabbit IgG      | Life technologies #A11008  | ICC-F                               |
| <b>Alexa fluor 488</b>                      | Goat anti-mouse           | Invitrogene, #A10680       | IF-P                                |
| <b>Alexa fluor 594</b>                      | Goat Anti-rabbit          | Life technologies, #A11012 | IF-P                                |
| <b>Isotype</b>                              | Goat IgG control          | R&D systems, #AB-108-C     | Flow cytometry                      |

|                              |                       |                          |                |
|------------------------------|-----------------------|--------------------------|----------------|
| <b>Isotype-PE</b>            | Mouse IgG1k           | eBioscience, #12-4714-82 | Flow cytometry |
| <b>Isotype-APC</b>           | Mouse IgG1            | Biolegend, #406609       | Flow cytometry |
| <b>Isotype</b>               | Mouse IgG             | Abcam, #ab190475         | IF-P           |
| <b>Isotype</b>               | Rabbit polyclonal IgG | Abcam, #ab27478          | IF-P           |
| <b>Phalloidin iFluor 594</b> |                       | ab176757                 | IF-C           |

### RNAscope probes

| <b>Reagent</b>     | <b>Brand</b>  | <b>code</b> | <b>Dilution</b> |
|--------------------|---------------|-------------|-----------------|
| <b>Hs-vimentin</b> | ACD-Biotechne | 310441-C2   | 1:50            |
| <b>Hs-ICAM1</b>    | ACD-Biotechne | 402951      | Undiluted       |
| <b>Hs-IL-34</b>    | ACD-Biotechne | 313011-C3   | 1:50            |
| <b>Hs-WNT2B</b>    | ACD-Biotechne | 453361      | Undiluted       |

## Supplementary figure 1

**A**

### Diseases and functions

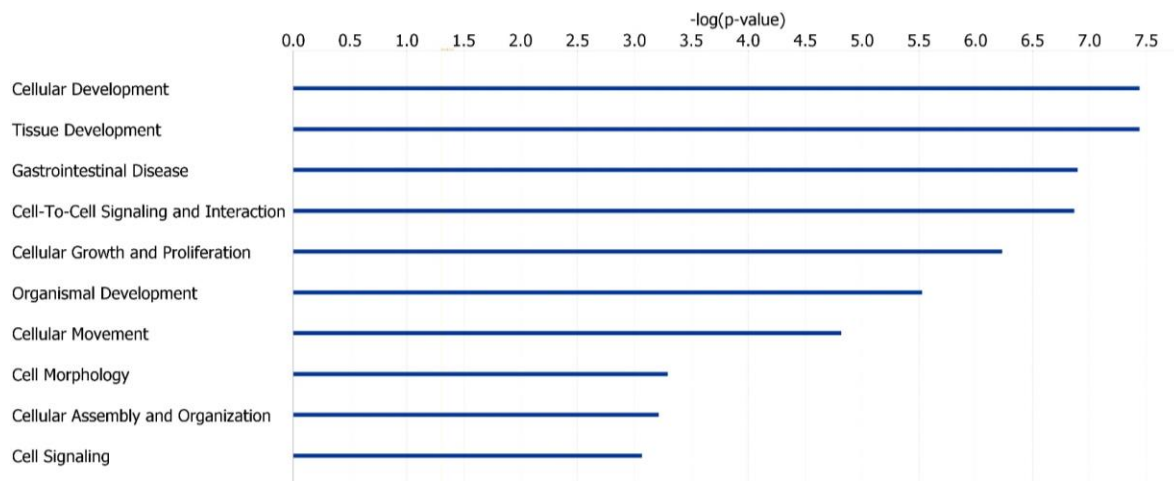

**B**

### Signaling pathways

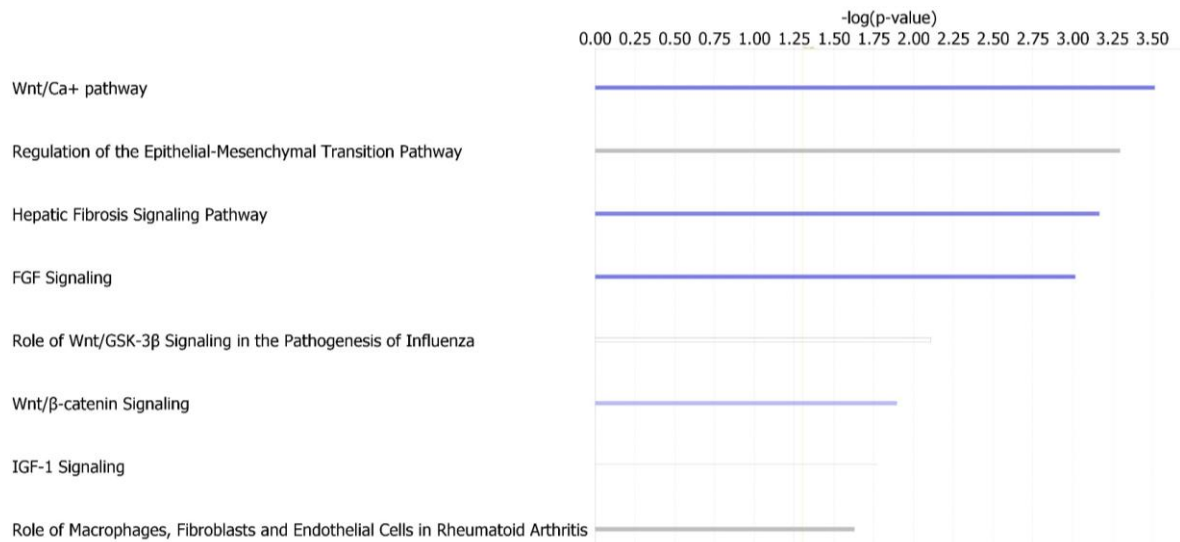

## Supplementary figure 2

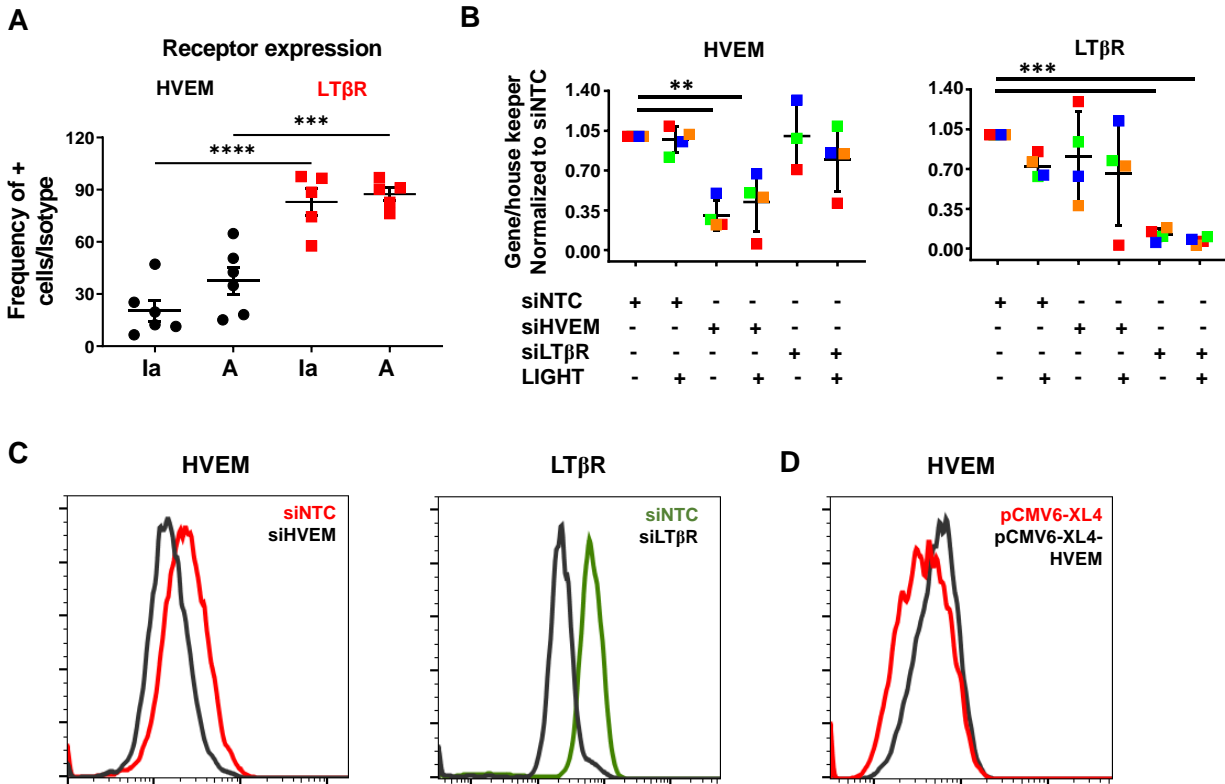

## Supplementary figure 3

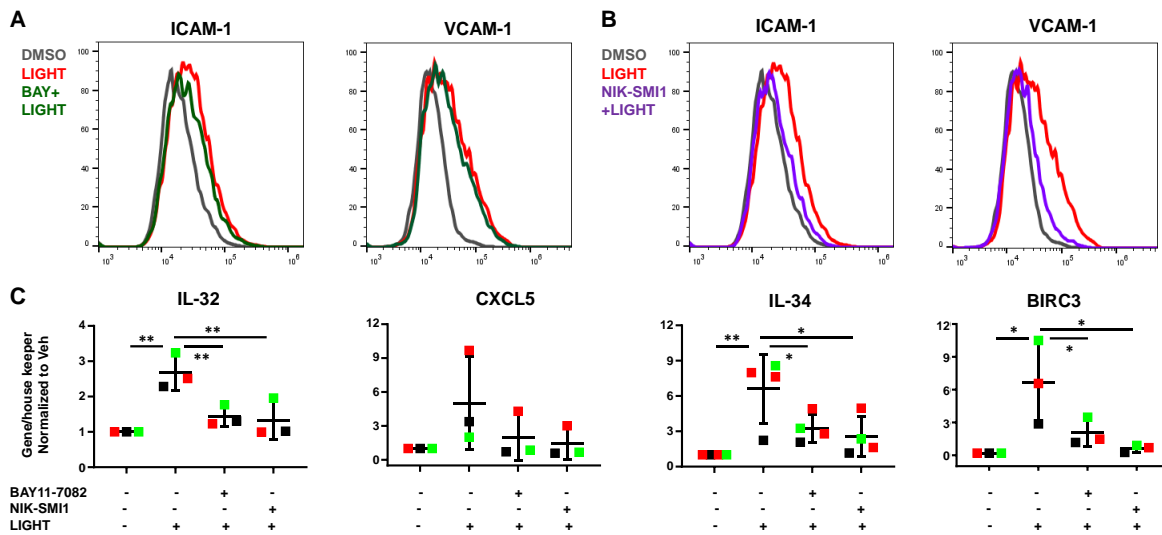

**Supplementary Figure 1.** Ingenuity Pathway Analysis of LIGHT down-regulated genes showing relevant diseases and functions and signaling pathways (n=4, >1.5 fold, p<0.05).

**Supplementary figure 2.** A, quantification of % of HVEM and LT $\beta$ R positive cells normalized to isotype from plots shown in Figure 1C (n=6, \*p<0.05). Validation of HVEM and LT $\beta$ R silencing in cells transfected with scramble RNA (siNTC) or siRNAs against HVEM (siHVEM) or LT $\beta$ R (siLT $\beta$ R) and untreated or treated with LIGHT for 24 hours analyzed by RT-PCR (B, n=4), or in cells transfected with siNTC and siHVEM or siLT $\beta$ R (C, n=3) or with pCMV6-XL4 or pCMV6-XL4L-HVEM analyzed by flow cytometry (D, n=3). Each colored dot represents fibroblasts from an independent donor. \*p<0.05 and \*\*\*p<0.001.

**Supplementary figure 3.** Representative histograms of flow cytometry of ICAM-1 and VCAM-1 in normal esophageal fibroblasts pre-treated with BAY11-7082 (A) or NIK-SMI1 (B) for 1 h and then treated with LIGHT for 4h (n=3). RT-PCR of inflammatory genes in esophageal fibroblasts pre-treated with BAY11-7082 or NIK-SMI1 for 1h and then treated with LIGHT for 4h (C, n $\geq$ 3). Each color dot represents fibroblasts from an independent donor. \*p<0.05, \*\*p<0.01.
